# Supplementary material for: Deletion of the chd7 Hinders Oligodendrocyte Progenitor Cell Development and Myelination in Zebrafish
Source: MDPI journal article supplement (doi:10.3390/ijms241713535), 2023-08-31
Supplement: s1 [file s1]

## Supplementary Figures

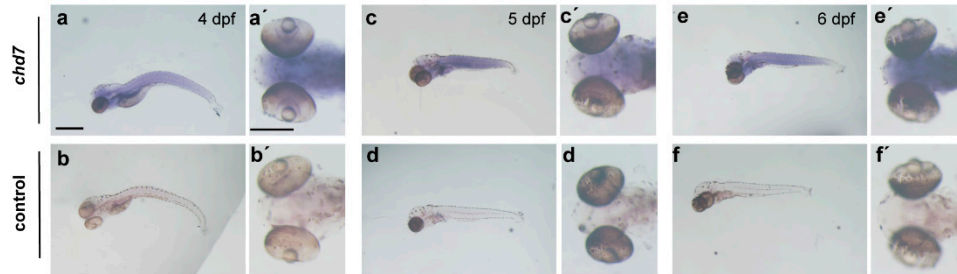

**Fig. S1. The temporal and spatial expression pattern of *chd7* at 4-6 dpf.**

**a-f)** Zebrafish at 4-6 dpf using WISH displayed high expression of *chd7* in the brain, eyes and spinal cord (lateral view). **a'-f')** Dorsal view of the brain. Scale bar in a-f, 10  $\mu\text{m}$ ; Scale bar in a' -f', 5  $\mu\text{m}$ .

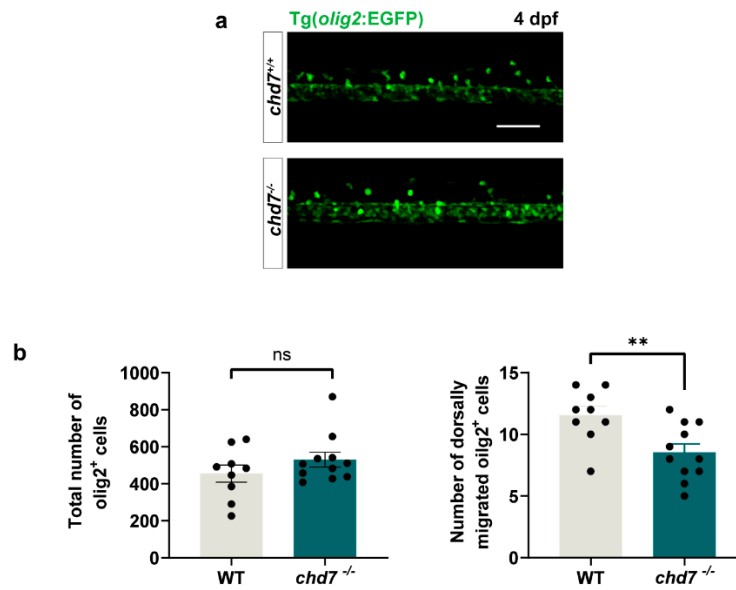

**Fig. S2. Total number of OPCs were not significantly changed after *chd7* deletion.**

**a)** Representative image of total and dorsally migrated olig2<sup>+</sup> cells at 4 dpf between *chd7*<sup>+/+</sup> and *chd7*<sup>-/-</sup> group. Scale bar: 10  $\mu$ m. **b)** The number of total olig2<sup>+</sup> cells at 4 dpf did not occur significantly difference between the two groups. **c)** The number of dorsally migrated olig2<sup>+</sup> cells at 4 dpf decreased in *chd7*<sup>-/-</sup> group. \*\* $p = 0.0075$ , unpaired Student's two-tailed *t*-test.
